# Supplementary material for: Phosphodiesterase 5a Signalling in Skeletal Muscle Pathophysiology
Source: MDPI journal article supplement (doi:10.3390/ijms24010703), 2022-12-31

**Supplementary Figure S1.** Immunofluorescence staining of Pde5a in proliferating ( $C_2C_{12}$  myoblasts) and differentiating mouse myogenic cells ( $C_2C_{12}$  myotubes). Green: Pde5; red: actin. Nuclei are stained with DAPI (blue).

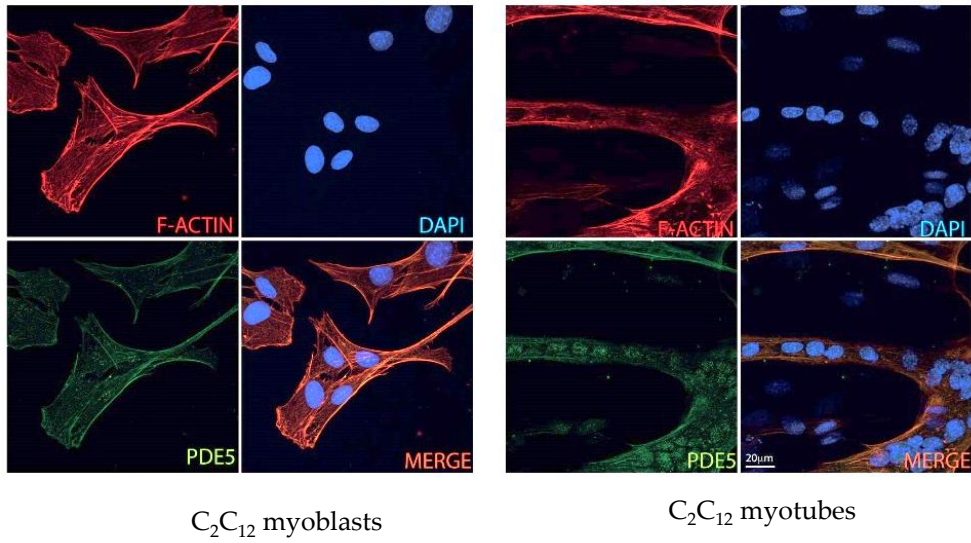

Supplementary Figure S2.

a) Schematic representation of *Pde5a* gene showing the localization of the two regions cloned and assayed for promoter activity; b) sequences of the regions cloned in luciferase vectors; c) aminoacid sequence of the first 2 exons of *Pde5a* murine variants showing that these isoforms differ in the N-terminal region.

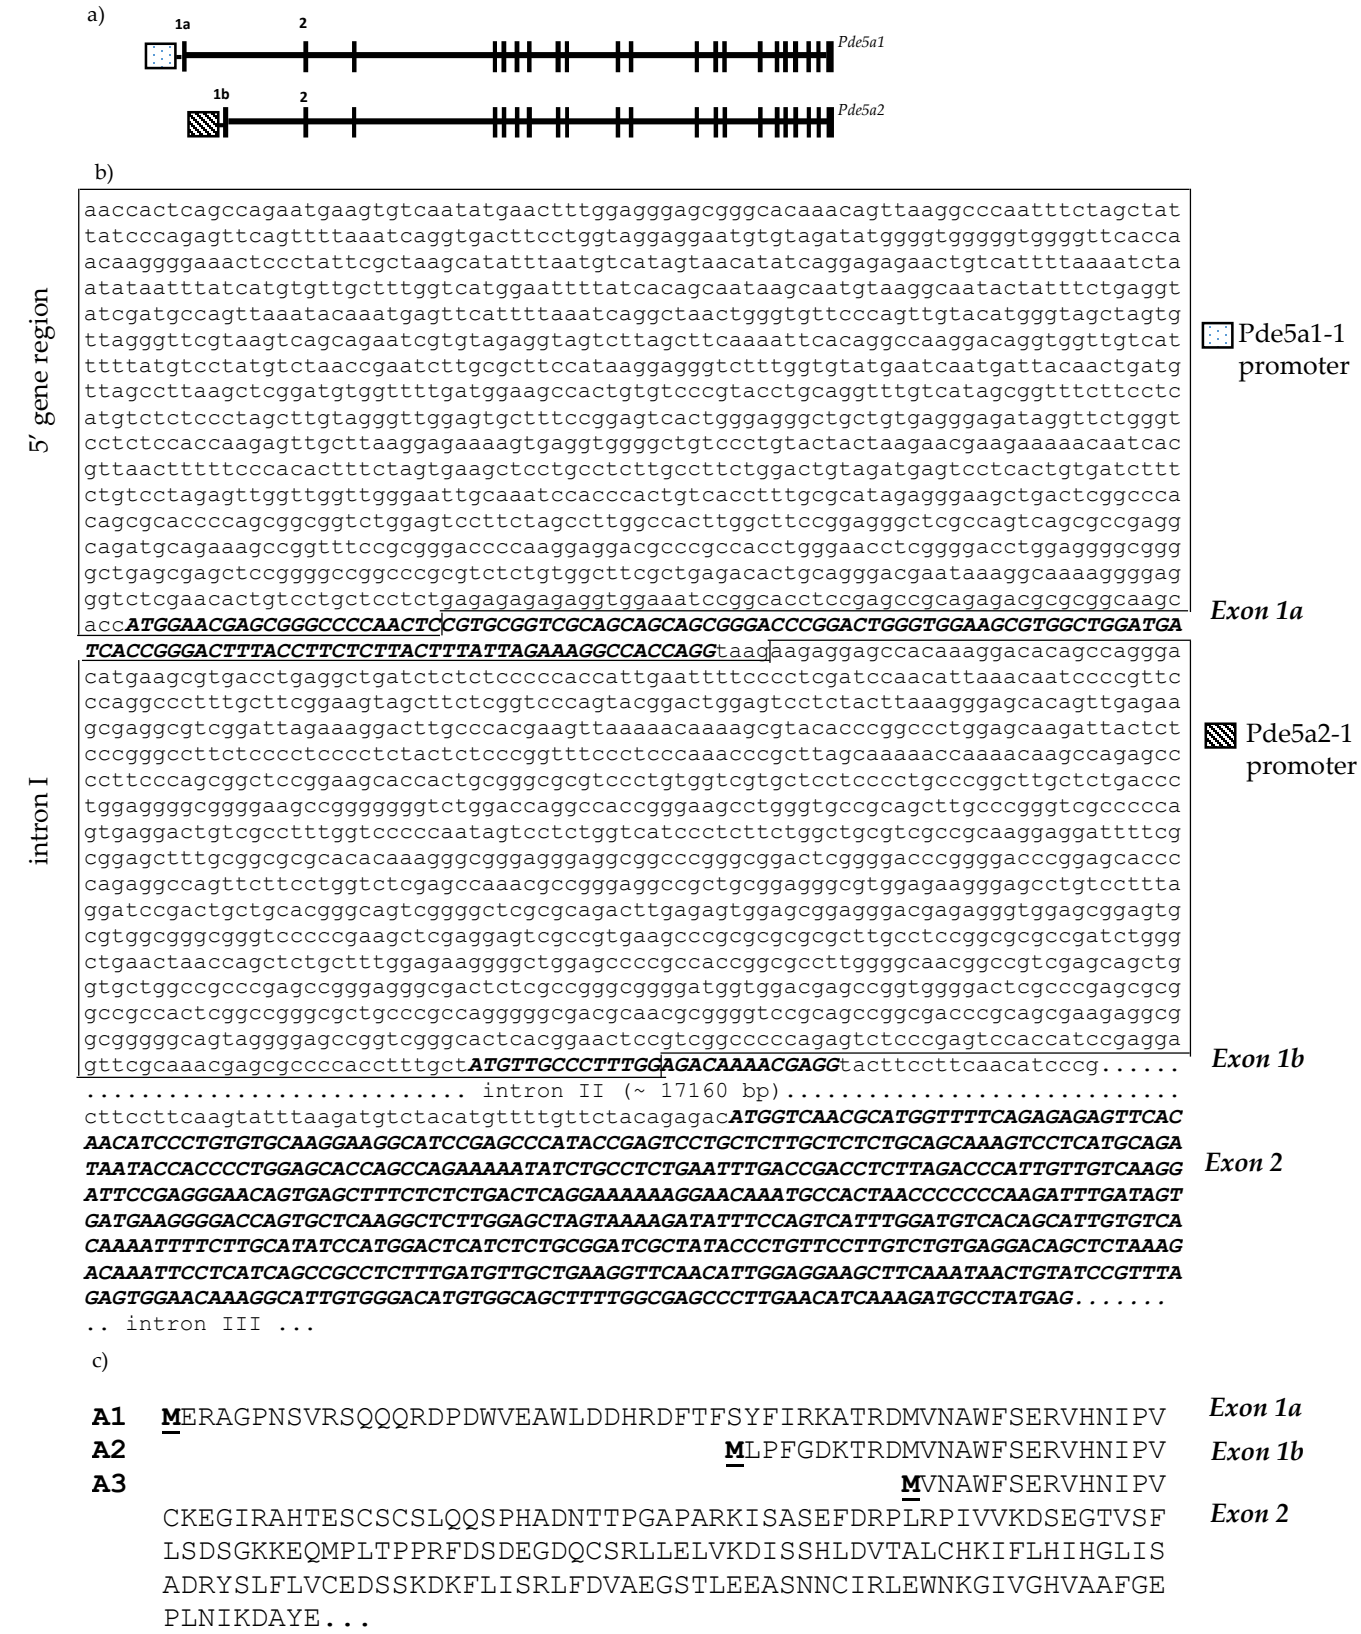

Supplement: s1 [file s1]
